# Supplementary material for: Excess non-COVID-19 mortality in Norway 2020–2022
Source: Springer Nature journal article supplement (doi:10.1186/s12889-023-17515-5), 2024-01-22

| All causes                                        |               |           |           |
|---------------------------------------------------|---------------|-----------|-----------|
|                                                   | Extrapolation |           |           |
|                                                   | 1 year        | 2 years   | 3 years   |
| <b>Reference years</b>                            | -11 to -1     | -12 to -2 | -13 to -3 |
| <b>Outcome years in study</b>                     | 2020          | 2021      | 2022      |
| <b>Reference years in study</b>                   | 2010-2019     | 2010-2019 | 2010-2019 |
| <b>Validation of predictions for 2010 to 2019</b> |               |           |           |
| <b>MAE%</b>                                       | 1.2%          | 1.8%      | 1.4%      |
| <b>RMSE%</b>                                      | 1.6%          | 2.2%      | 1.6%      |
| <b>Outside 95% prediction interval</b>            | 0%            | 10%       | 0%        |

The table shows mean absolute error% (MAE%) and root mean square error% (RMSE%) for age standardised mortality rate (ASMR) predictions for the ten years preceding the COVID-19 pandemic, ie 2010-2019.

Predictions are based on extrapolation from linear 10-year trend until one-, two- or three years prior to each year predicted.

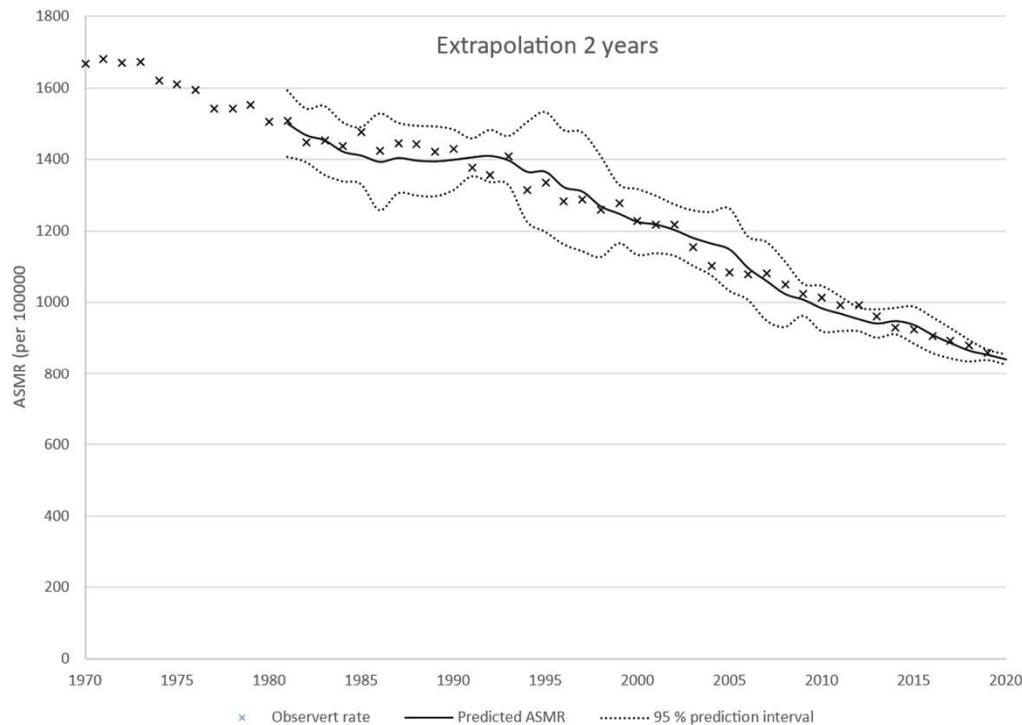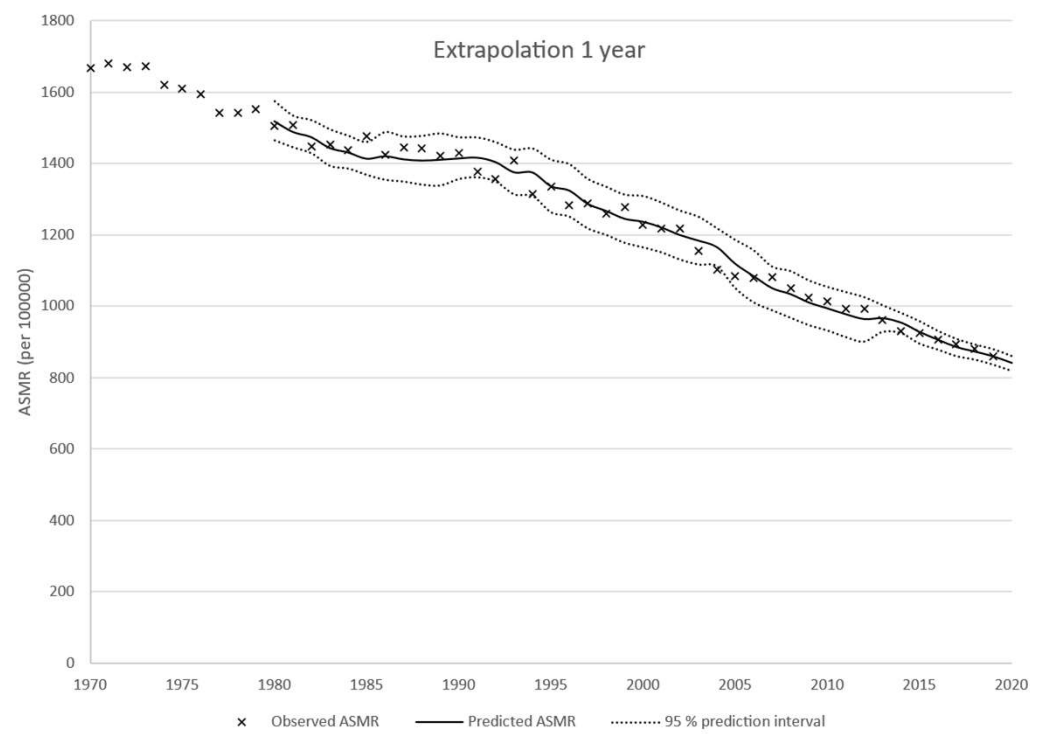

The figures display observed ASMR compared with moving predictions with 95% prediction intervals (PI) based on one-, two- or three-year extrapolations from preceding 10-year linear trends.

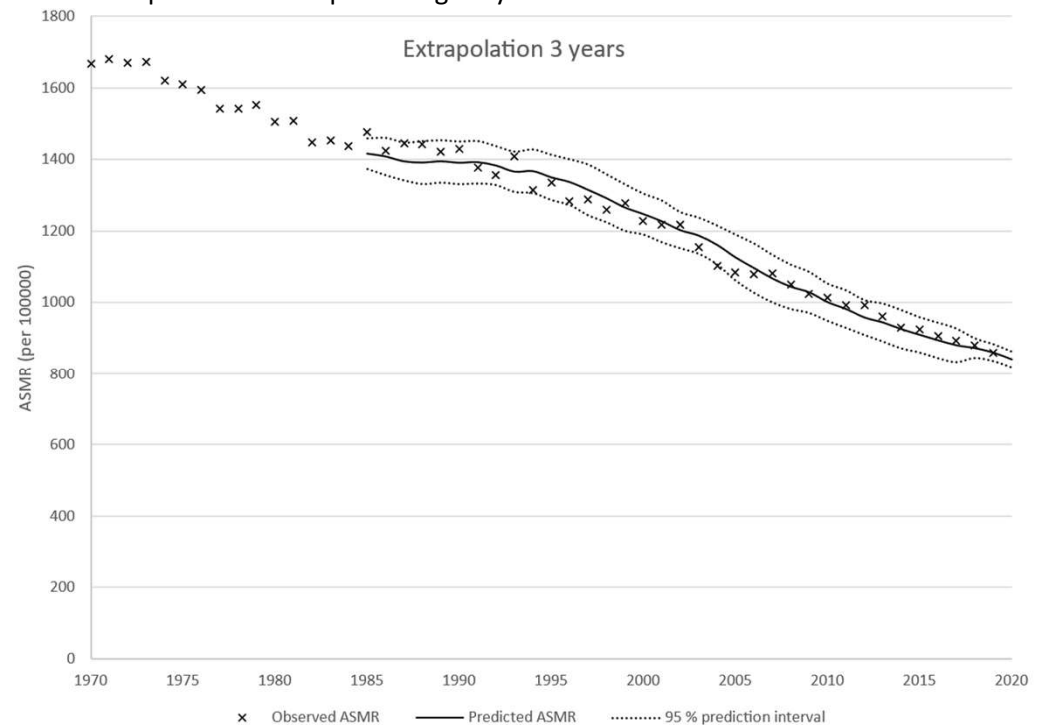

# Malignant tumours (cancer)

|                                                   | Extrapolation |           |           |
|---------------------------------------------------|---------------|-----------|-----------|
|                                                   | 1 year        | 2 years   | 3 years   |
| <b>Reference years</b>                            | -11 to -1     | -12 to -2 | -13 to -3 |
| <b>Outcome years in study</b>                     | 2020          | 2021      | 2022      |
| <b>Reference years in study</b>                   | 2010-2019     | 2010-2019 | 2010-2019 |
| <b>Validation of predictions for 2010 to 2019</b> |               |           |           |
| <b>MAE%</b>                                       | 1.2%          | 1.4%      | 1.5%      |
| <b>RMSE%</b>                                      | 1.4%          | 1.6%      | 1.7%      |
| <b>Outside 95% prediction interval</b>            | 0%            | 10%       | 0%        |

The table shows mean absolute error% (MAE%) and root mean square error% (RMSE%) for age standardised mortality rate (ASMR) predictions for the ten years preceding the COVID-19 pandemic, ie 2010-2019.

Predictions are based on extrapolation from linear 10-year trend until one-, two- or three years prior to each year predicted.

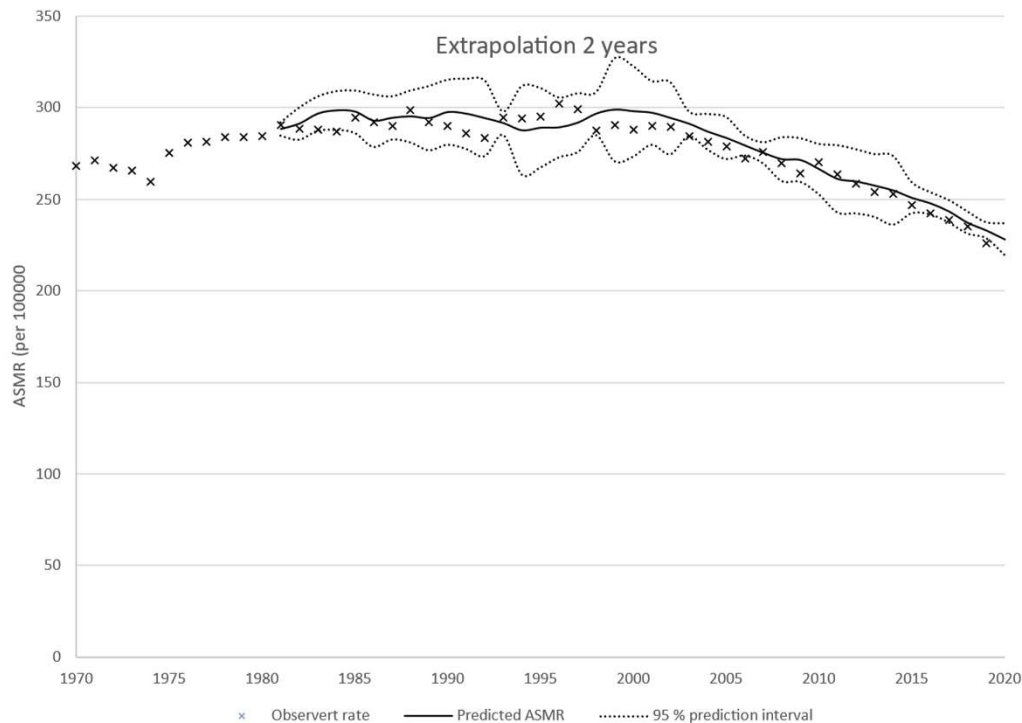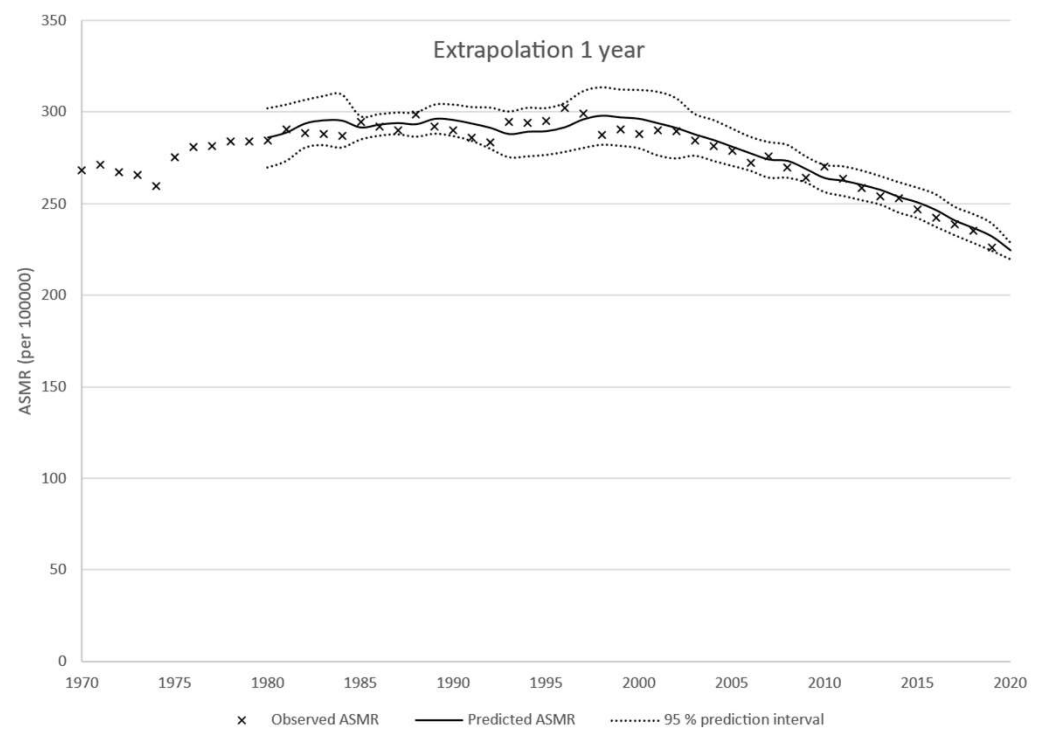

The figures display observed ASMR compared with moving predictions with 95% prediction intervals (PI) based on one-, two- or three-year extrapolations from preceding 10-year linear trends.

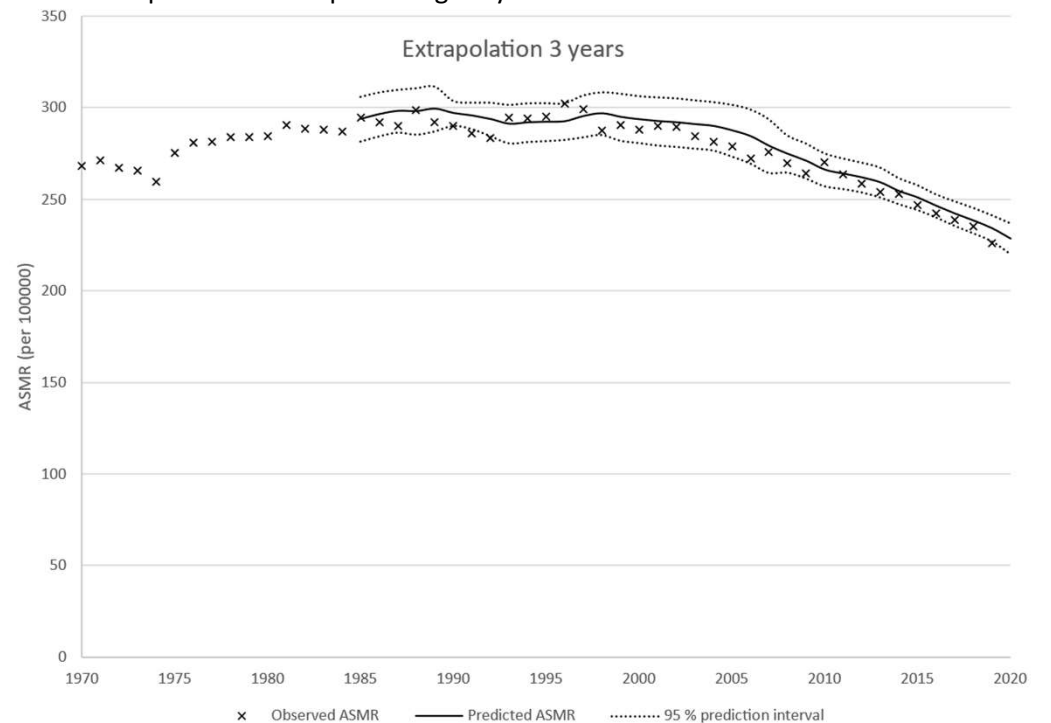

# Cardiovascular diseases

|                                                            | Extrapolation |           |           |
|------------------------------------------------------------|---------------|-----------|-----------|
|                                                            | 1 year        | 2 years   | 3 years   |
| <b>Reference years</b>                                     | -11 to -1     | -12 to -2 | -13 to -3 |
| <b>Outcome years in study</b>                              | 2020          | 2021      | 2022      |
| <b>Reference years in study</b>                            | 2010-2019     | 2010-2019 | 2010-2019 |
| <b>Validation, predictions for 10 years (2010 to 2019)</b> |               |           |           |
| <b>MAE%</b>                                                | 3.3%          | 5.3%      | 5.7%      |
| <b>RMSE%</b>                                               | 4.7%          | 7.0%      | 6.8%      |
| <b>Outside 95% prediction interval</b>                     | 0%            | 20%       | 0%        |

The table shows mean absolute error% (MAE%) and root mean square error% (RMSE%) for age standardised mortality rate (ASMR) predictions for the ten years preceding the COVID-19 pandemic, ie 2010-2019.

Predictions are based on extrapolation from linear 10-year trend until one-, two- or three years prior to each year predicted.

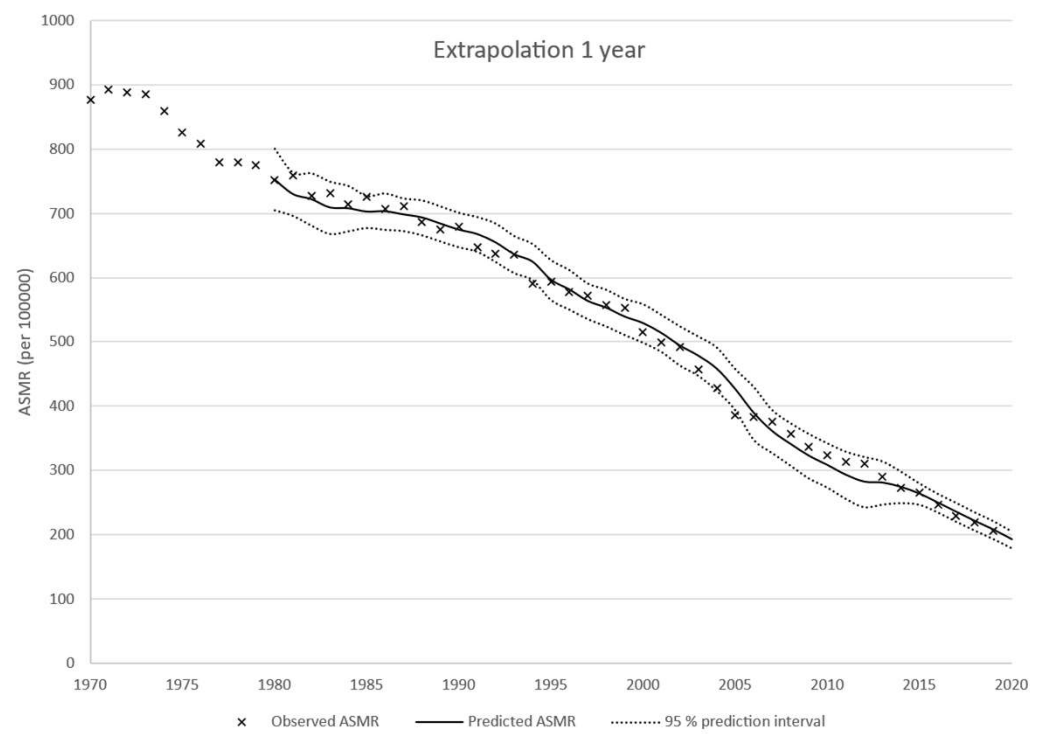

The figures display observed ASMR compared with moving predictions with 95% prediction intervals (PI) based on one-, two- or three-year extrapolations from preceding 10-year linear trends.

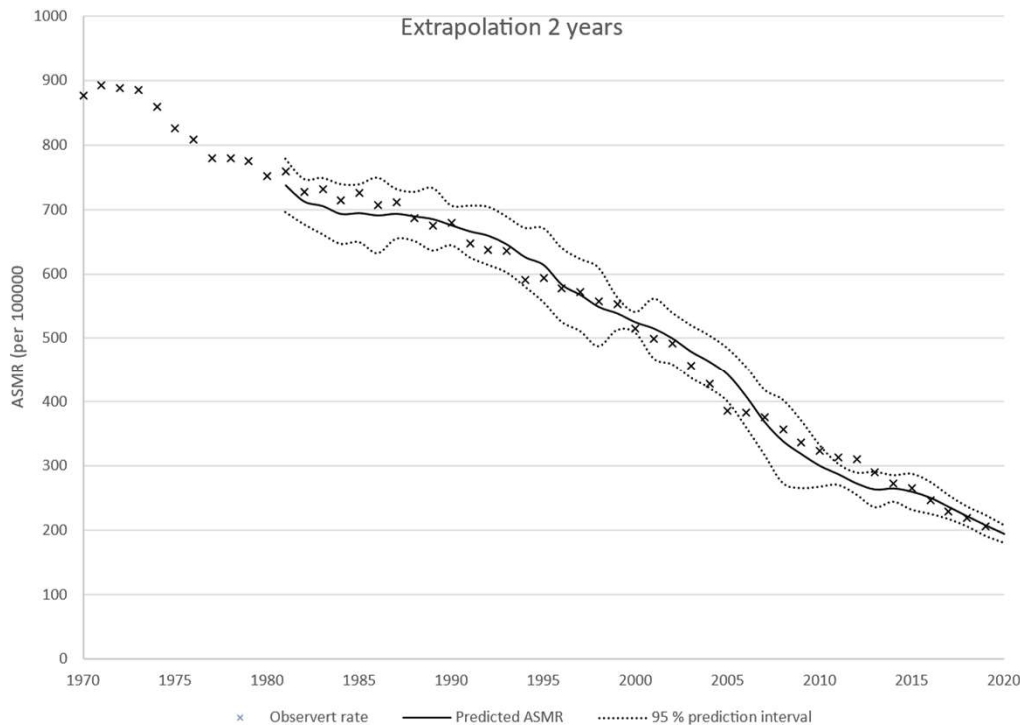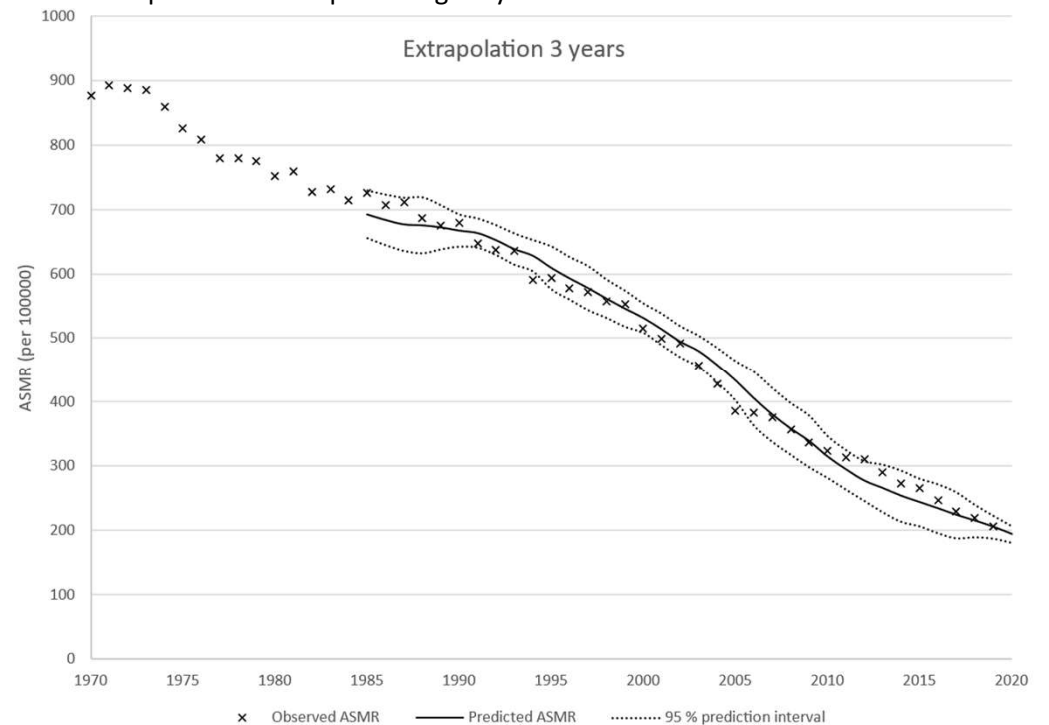

# Respiratory diseases

|                                                   | Extrapolation |           |           |
|---------------------------------------------------|---------------|-----------|-----------|
|                                                   | 1 year        | 2 years   | 3 years   |
| <b>Reference years</b>                            | -11 to -1     | -12 to -2 | -13 to -3 |
| <b>Outcome years in study</b>                     | 2020          | 2021      | 2022      |
| <b>Reference years in study</b>                   | 2010-2019     | 2010-2019 | 2010-2019 |
| <b>Validation of predictions for 2010 to 2019</b> |               |           |           |
| <b>MAE%</b>                                       | 5.7%          | 6.5%      | 5.1%      |
| <b>RMSE%</b>                                      | 6.6%          | 7.7%      | 6.4%      |
| <b>Outside 95% prediction interval</b>            | 0%            | 10%       | 0%        |

The table shows mean absolute error% (MAE%) and root mean square error% (RMSE%) for age standardised mortality rate (ASMR) predictions for the ten years preceding the COVID-19 pandemic, ie 2010-2019.

Predictions are based on extrapolation from linear 10-year trend until one-, two- or three years prior to each year predicted.

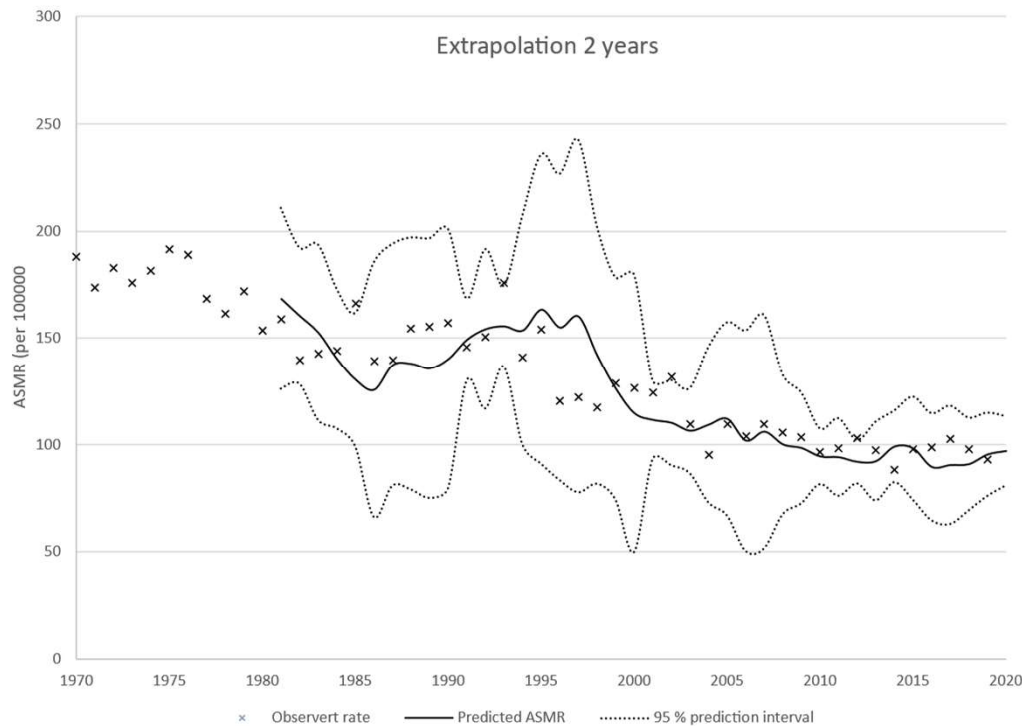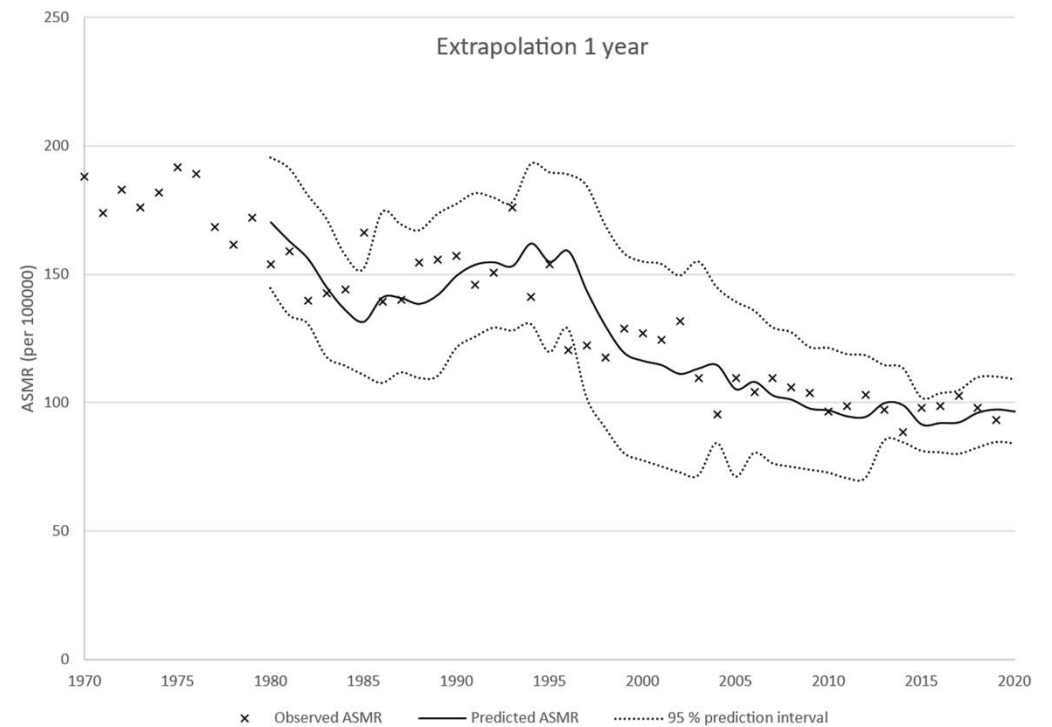

The figures display observed ASMR compared with moving predictions with 95% prediction intervals (PI) based on one-, two- or three-year extrapolations from preceding 10-year linear trends.

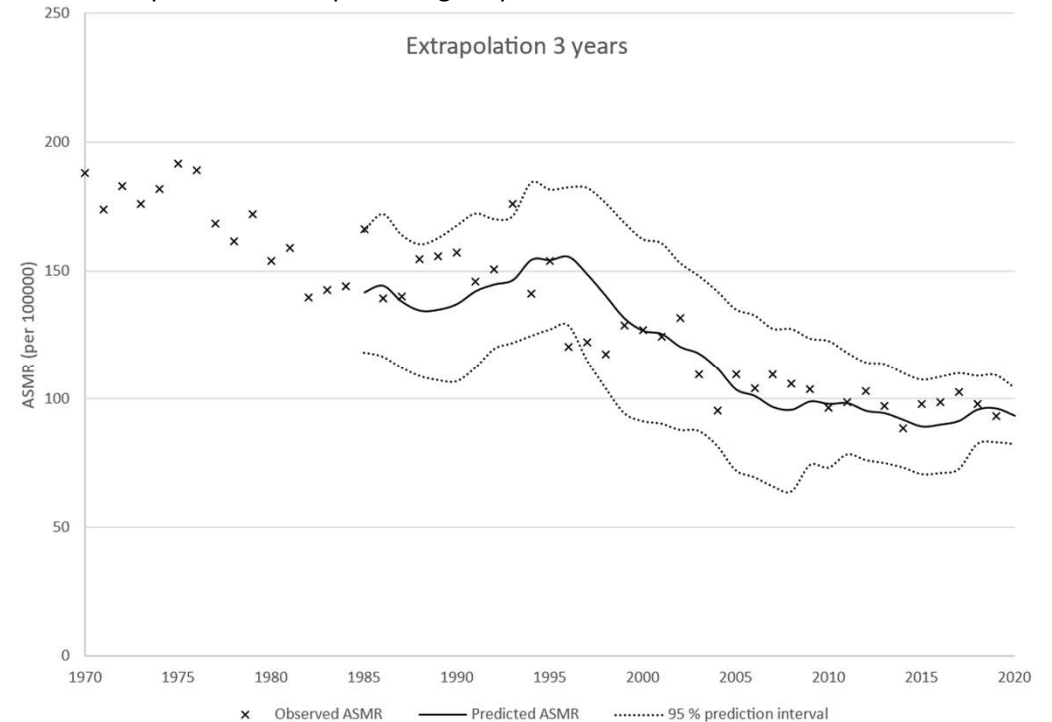

# Dementia incl. Alzheimer's

|                                                   | Extrapolation |           |           |
|---------------------------------------------------|---------------|-----------|-----------|
|                                                   | 1 year        | 2 years   | 3 years   |
| <b>Reference years</b>                            | -11 to -1     | -12 to -2 | -13 to -3 |
| <b>Outcome years in study</b>                     | 2020          | 2021      | 2022      |
| <b>Reference years in study</b>                   | 2010-2019     | 2010-2019 | 2010-2019 |
| <b>Validation of predictions for 2010 to 2019</b> |               |           |           |
| <b>MAE%</b>                                       | 3.9%          | 4.6%      | 2.8%      |
| <b>RMSE%</b>                                      | 4.5%          | 5.5%      | 4.0%      |
| <b>Outside 95% prediction interval</b>            | 10%           | 10%       | 10%       |

The table shows mean absolute error% (MAE%) and root mean square error% (RMSE%) for age standardised mortality rate (ASMR) predictions for the ten years preceding the COVID-19 pandemic, ie 2010-2019.

Predictions are based on extrapolation from linear 10-year trend until one-, two- or three years prior to each year predicted.

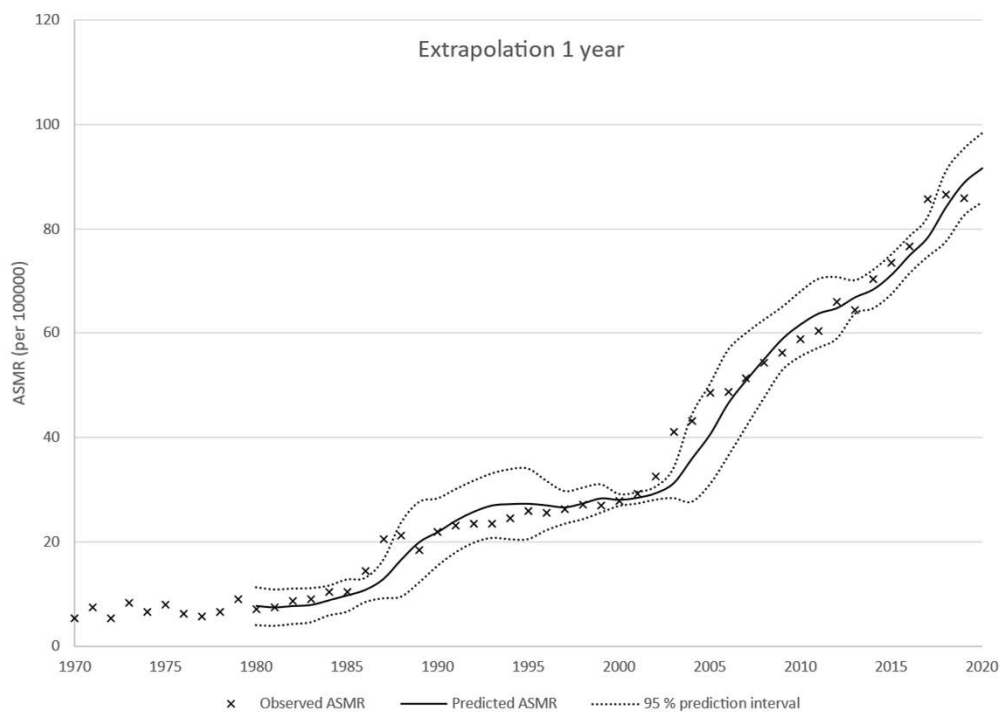

The figures display observed ASMR compared with moving predictions with 95% prediction intervals (PI) based on one-, two- or three-year extrapolations from preceding 10-year linear trends.

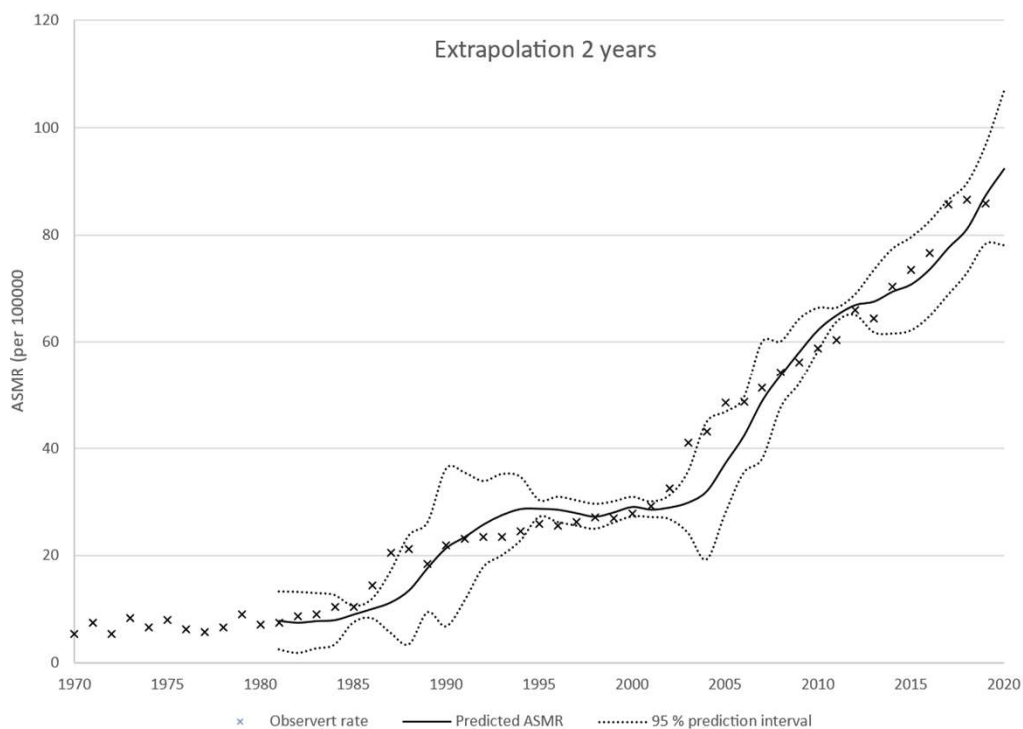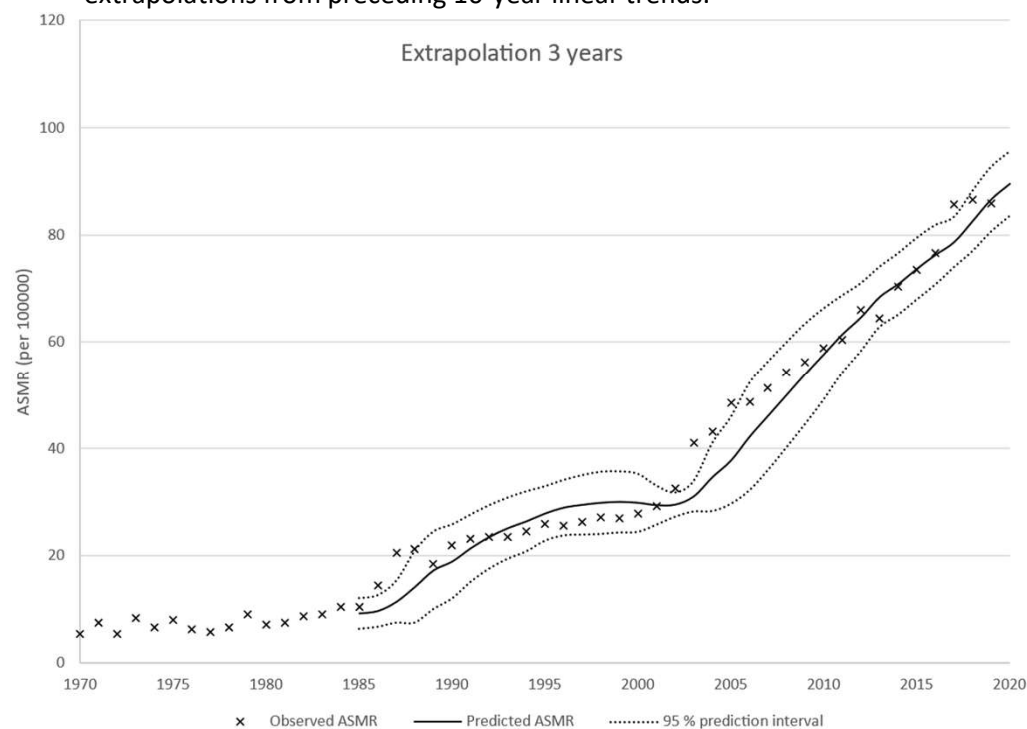

| External causes                                   |               |           |           |
|---------------------------------------------------|---------------|-----------|-----------|
|                                                   | Extrapolation |           |           |
|                                                   | 1 year        | 2 years   | 3 years   |
| <b>Reference years</b>                            | -11 to -1     | -12 to -2 | -13 to -3 |
| <b>Outcome years in study</b>                     | 2020          | 2021      | 2022      |
| <b>Reference years in study</b>                   | 2010-2019     | 2010-2019 | 2010-2019 |
|                                                   |               |           |           |
| <b>Validation of predictions for 2010 to 2019</b> |               |           |           |
| <b>MAE%</b>                                       | 2.8%          | 3.1%      | 2.6%      |
| <b>RMSE%</b>                                      | 3.8%          | 3.6%      | 3.4%      |
| <b>Outside 95% prediction interval</b>            | 0%            | 0%        | 0%        |

The table shows mean absolute error% (MAE%) and root mean square error% (RMSE%) for age standardised mortality rate (ASMR) predictions for the ten years preceding the COVID-19 pandemic, ie 2010-2019.

Predictions are based on extrapolation from linear 10-year trend until one-, two- or three years prior to each year predicted.

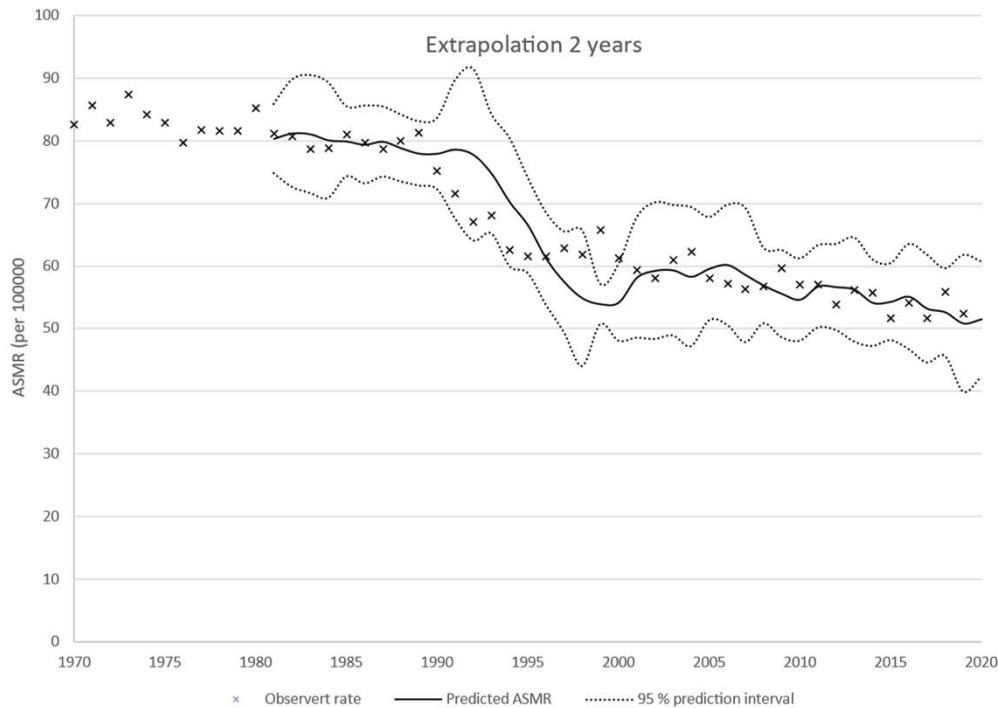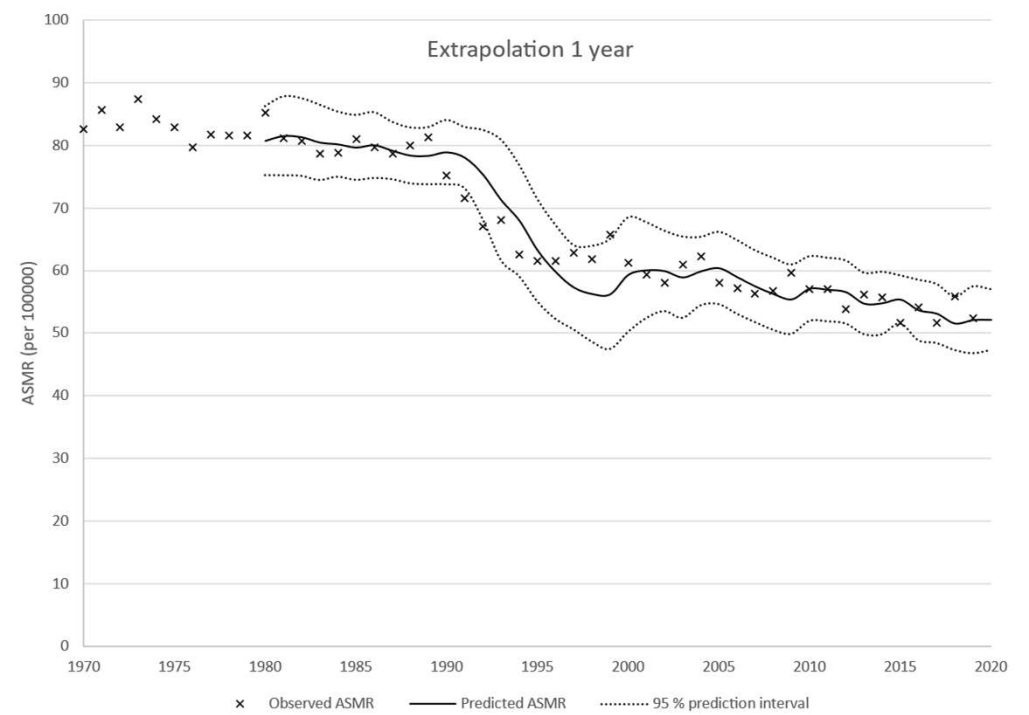

The figures display observed ASMR compared with moving predictions with 95% prediction intervals (PI) based on one-, two- or three-year extrapolations from preceding 10-year linear trends.

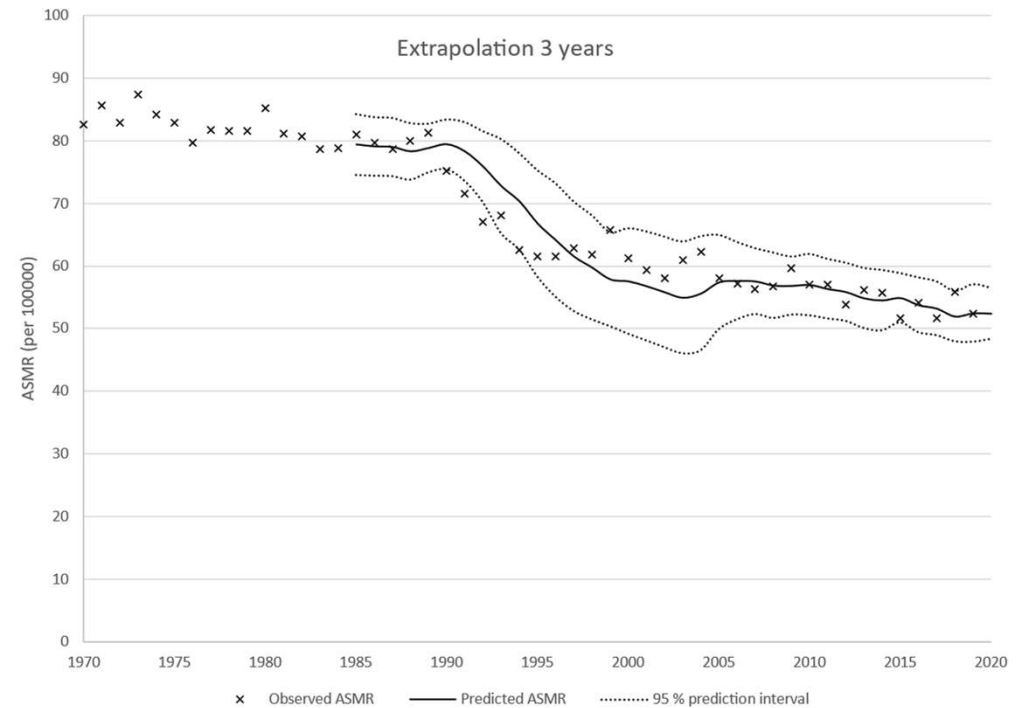

Supplement: MOESM2 [file 26650142]
